# Supplementary material
Source: Springer Nature journal article supplement (https://www.springermedizin.de/resource/supplementary/12936_2007_420_MOESM3_ESM.pdf/9547410)
Supplement: MOESM3 [file 9547410]

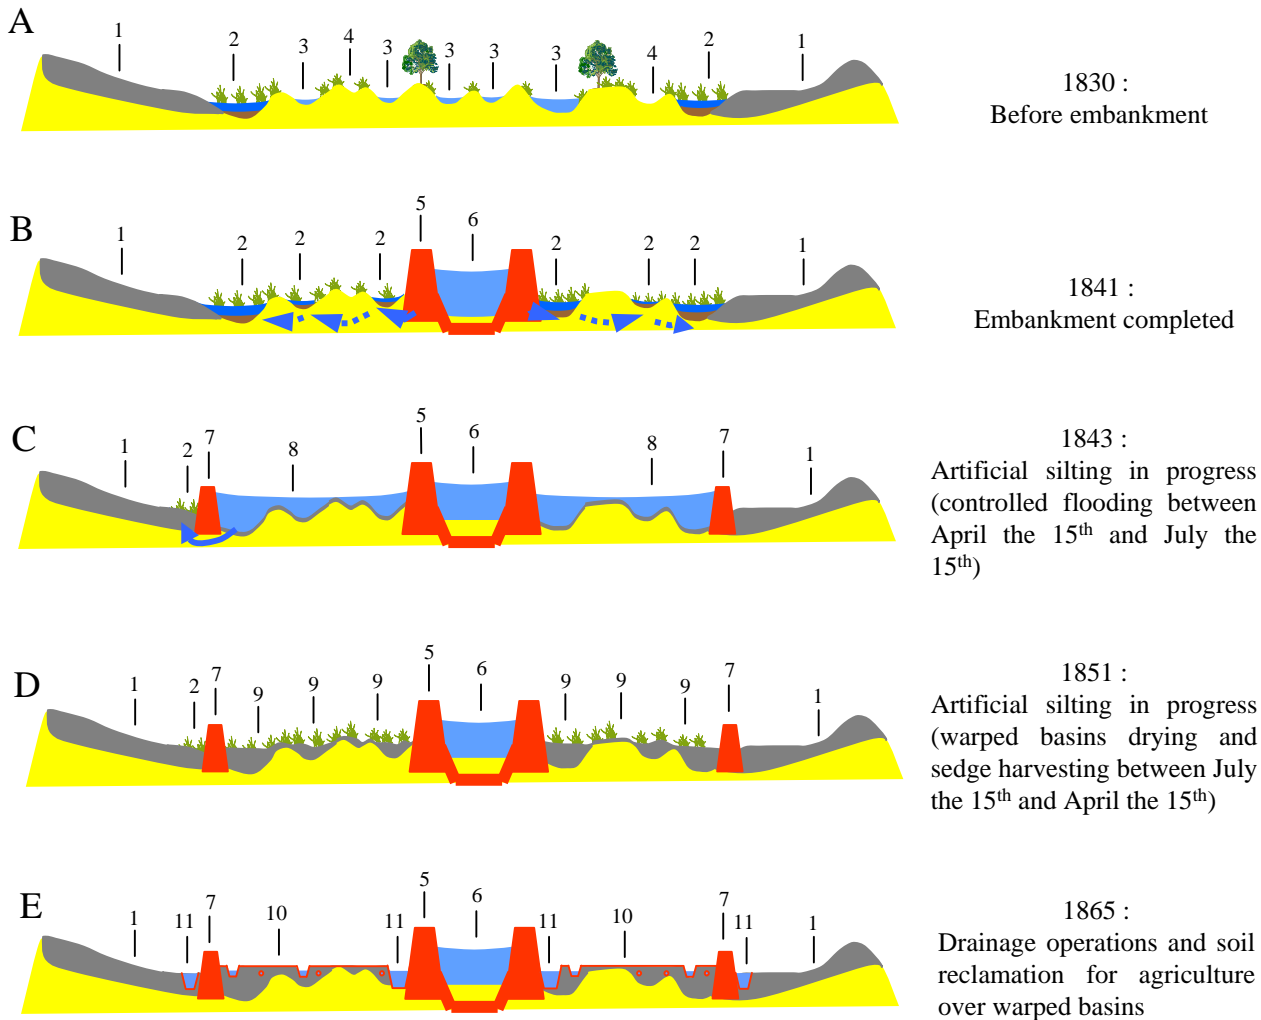

 Old coarse alluvium material deposited by the braided river (sand, gravel, pebbles)

 Isère water

 Seeping water

 Colour characterizing hydraulic developments
